# Supplementary material for: Direct conversion of syngas into light aromatics over Cu-promoted ZSM-5 with ceria–zirconia solid solution
Source: Royal Society of Chemistry journal article supplement (doi:10.1039/d0cy01421d), 2020-01-01
Supplement: d0cy01421d1.pdf [file d0cy01421d1.pdf]

## Supplementary Information

### **Efficient Syngas Conversion into Light Aromatics over Ceria-Zirconia and Cu-ZSM-5 Bifunctional Catalyst**

Sheng Wang<sup>a</sup>, Zhen Huang<sup>a,\*</sup>, Yajun Luo<sup>a</sup>, Jinhao Wang<sup>a</sup>, Yue Fang<sup>a</sup>, Weimin Hua<sup>a</sup>, Yinghong Yue<sup>a</sup>,  
Hualong Xu<sup>a</sup>, and Wei Shen<sup>a,\*</sup>

<sup>a</sup> *Department of Chemistry, Shanghai Key Laboratory of Molecular Catalysis and Innovative Materials and Laboratory of Advanced Materials, Collaborative Innovation Center of Chemistry for Energy Materials, Fudan University, Shanghai 200433, P.R. China.*

\* *Corresponding authors. Tel.: +86 21 31242401; E-mail: huangzhen@fudan.edu.cn; wshen@fudan.edu.cn;*

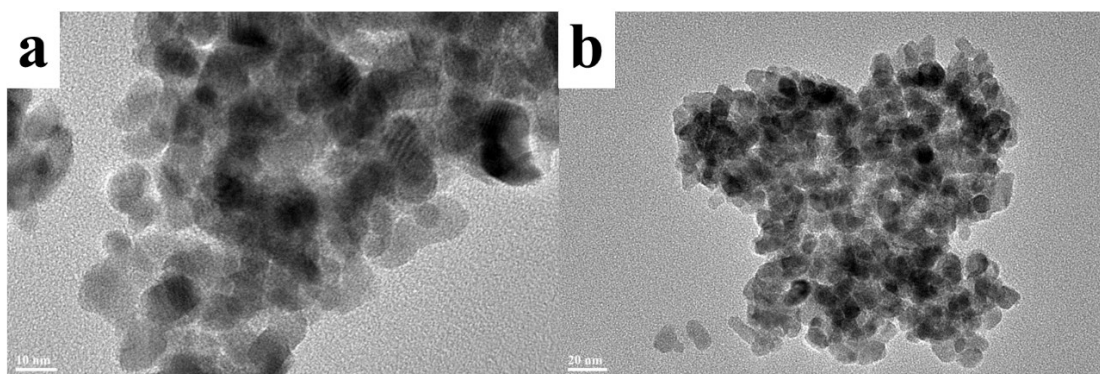

Fig. S1. TEM images of CZS ( $\text{Ce}_{0.2}\text{Zr}_{0.8}\text{O}_x$ ).

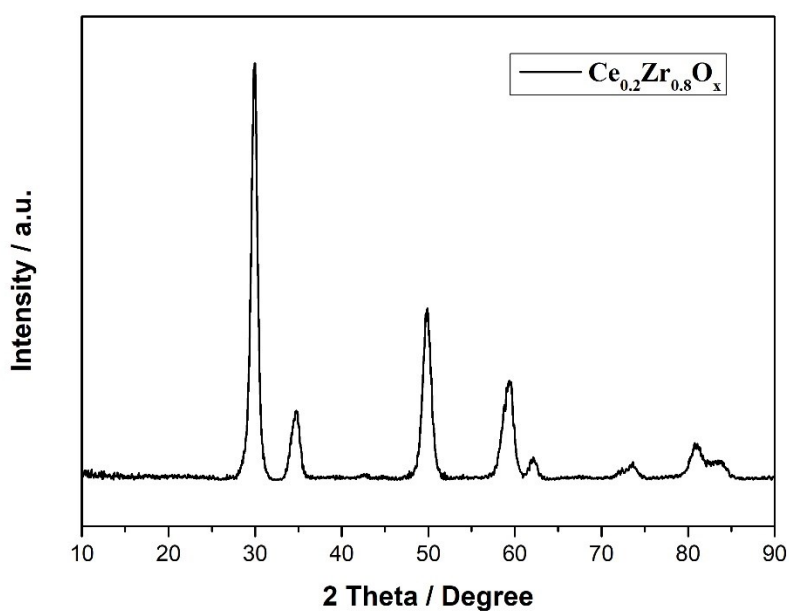

Fig. S2. XRD pattern of CZS ( $\text{Ce}_{0.2}\text{Zr}_{0.8}\text{O}_x$ ).

Table S1. Textural properties of ceria-zirconia solid solutions.

| Sample                                     | $S_{\text{BET}}^a$<br>( $\text{m}^2/\text{g}$ ) | $V_{\text{pore}}^a$<br>( $\text{cm}^3/\text{g}$ ) | $d_{\text{pore}}^a$<br>(nm) | Crystal parameters <sup>b</sup> (nm) |   |        |
|--------------------------------------------|-------------------------------------------------|---------------------------------------------------|-----------------------------|--------------------------------------|---|--------|
|                                            |                                                 |                                                   |                             | a                                    | b | c      |
| $\text{Ce}_{0.2}\text{Zr}_{0.8}\text{O}_2$ | 79.2                                            | 0.37                                              | 18.8                        | 0.3634                               | - | 0.5238 |

<sup>a</sup> The BET surface area, pore volume and average pore size were determined by  $\text{N}_2$  physisorption. <sup>b</sup> Lattice parameters were obtained from XRD studies.

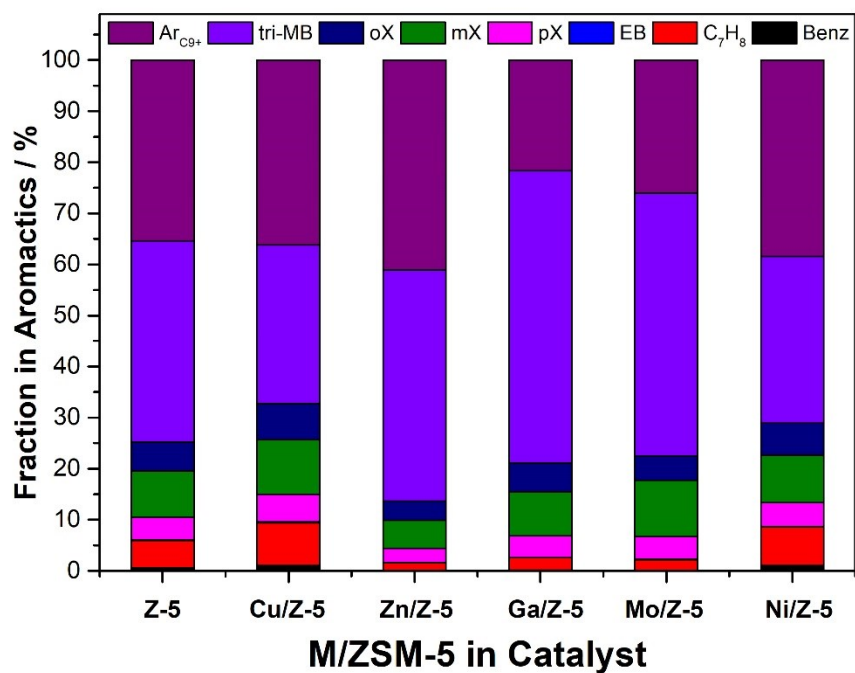

Fig. S3. The effect of metal on ZSM-5 catalyst on the aromatics distributions. Reaction conditions: catalyst = CZS + Zeolite (weight ratio = 1), 450 °C, TOS=20 h, 3.6 MPa, GHSV = 600 ml<sub>syngas</sub> / g<sub>cat.</sub> · h.

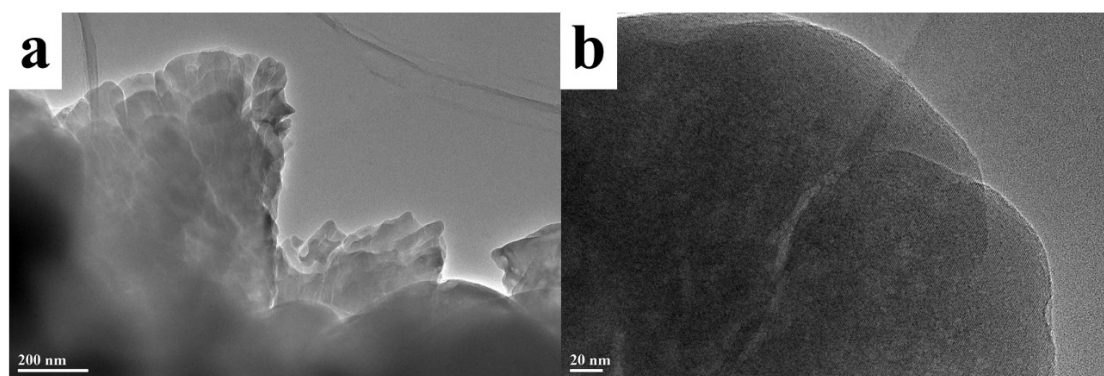

Fig. S4. TEM images of ZSM-5 (Si/Al = 120).

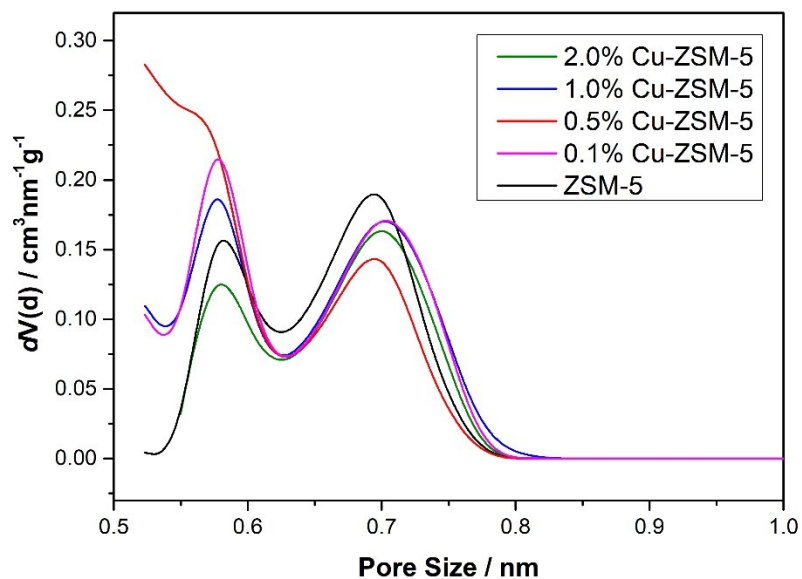

Fig. S5. The micropore size distributions of ZSM-5 samples calculated with N<sub>2</sub>-DFT model

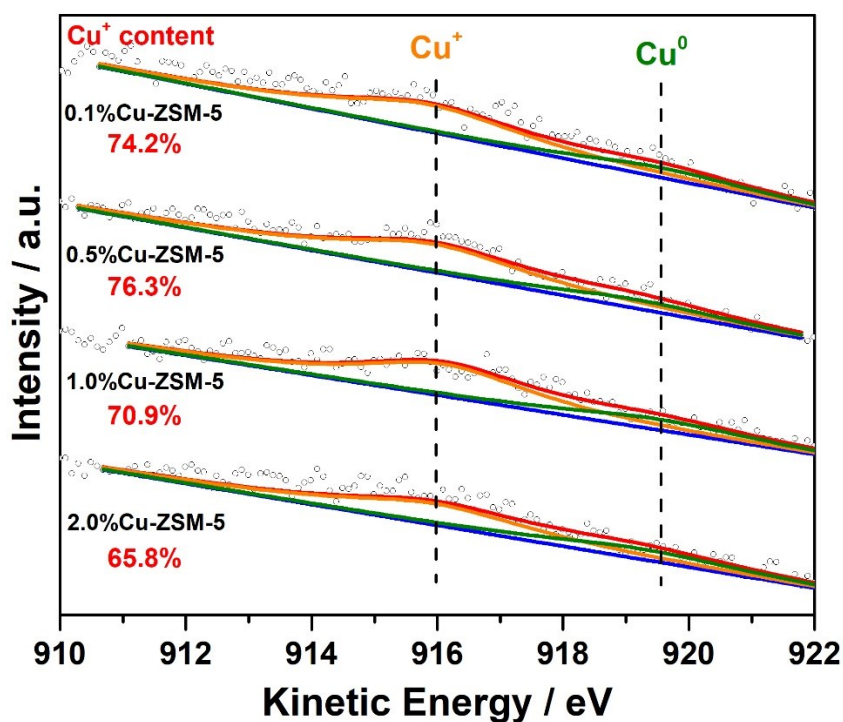

Fig. S6. Cu LMM X-ray excited Auger electron spectra of the reduced Cu-ZSM-5 catalysts with different copper contents. Cu<sup>+</sup> content was calculated based on peak area ( $X_{Cu^+} = Cu^+ / (Cu^+ + Cu^0)$ ).

---

Table S2. H<sub>2</sub>/Cu consumption ratios derived from TPR spectra.

---

| Sample       | Cu loading            | H <sub>2</sub> consumption | H <sub>2</sub> /Cu |
|--------------|-----------------------|----------------------------|--------------------|
|              | ( $\mu\text{mol/g}$ ) | ( $\mu\text{mol/g}$ )      |                    |
| 0.1%Cu-ZSM-5 | 15.7                  | 4.36                       | 0.28               |
| 0.5%Cu-ZSM-5 | 78.5                  | 35.81                      | 0.46               |
| 1.0%Cu-ZSM-5 | 157.5                 | 68.47                      | 0.43               |
| 2.0%Cu-ZSM-5 | 314.9                 | 148.04                     | 0.47               |

---

---

Table S3. The acidity of ZSM-5 and Cu-ZMS-5 analyzed by <sup>31</sup>P MAS NMR.

---

| Sample          | Acidity / ( $\mu\text{mol/g}$ ) |            |
|-----------------|---------------------------------|------------|
|                 | Brønsted acid                   | Lewis acid |
| ZSM-5           | 105                             | -          |
| 0.5%Cu-ZSM-5    | 64                              | 91         |
| 0.5%Cu-ZSM-5-re | 81                              | 57         |

---

Table S4. The catalytic performance of control catalysts.<sup>a</sup>

| Samples                                       | CO<br>conv<br>./ % | CO <sub>2</sub><br>select. /<br>% | Selectivity in Hydrocarbons / % |                                 |                                 |                 |    |        |
|-----------------------------------------------|--------------------|-----------------------------------|---------------------------------|---------------------------------|---------------------------------|-----------------|----|--------|
|                                               |                    |                                   | CH <sub>4</sub>                 | C <sub>2-4</sub> , <sup>=</sup> | C <sub>2-4</sub> , <sup>o</sup> | C <sub>5+</sub> | Ar | Others |
| SiO <sub>2</sub> + 0.5%Cu-<br>Z5 <sup>b</sup> | 0.5                | 50.3                              | 25.7                            | 5.5                             | 65.0                            | 2.6             | /  | /      |
| CZS + SiO <sub>2</sub> <sup>b</sup>           | 12.8               | 36.2                              | 9.6                             | 47.2                            | 25.4                            | 17.6            | /  | 0.2    |

<sup>a</sup> Reaction conditions: catalyst = oxide + zeolite (weight ratio = 1), 450 °C, 3.6 MPa, TOS = 10 h, GHSV = 600 ml<sub>syngas</sub> / g<sub>cat</sub> · h. <sup>b</sup> SiO<sub>2</sub> (quartz sand) used as a control. (C<sub>2-4</sub><sup>=</sup>, C<sub>2-4</sub><sup>o</sup>, C<sub>5+</sub>, and Ar denote C<sub>2</sub>-C<sub>4</sub> olefins, C<sub>2</sub>-C<sub>4</sub> paraffins, C<sub>5+</sub> hydrocarbons exclusive of aromatics, and aromatics, respectively).

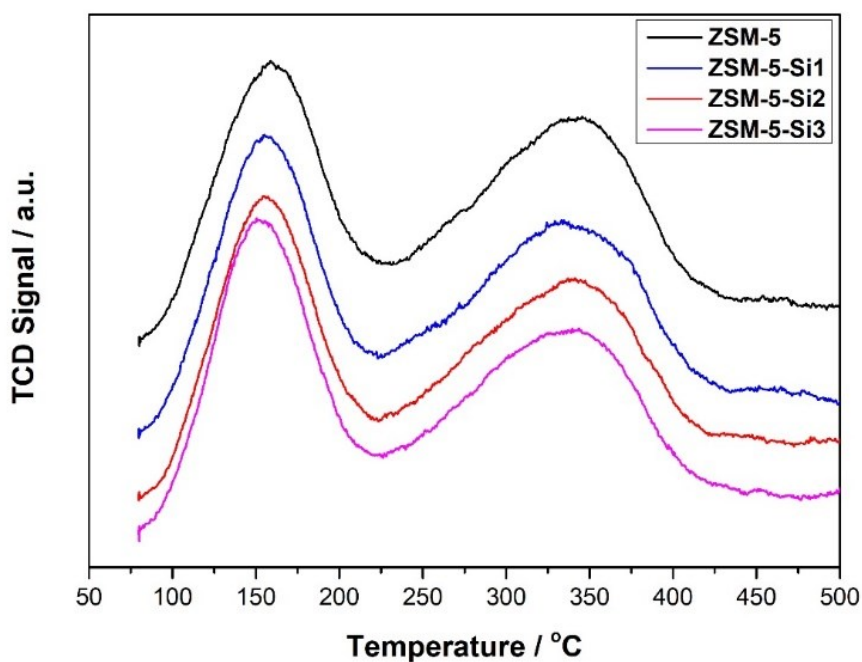

Fig. S7. NH<sub>3</sub>-TPD profiles of passivated ZSM-5 samples

Table S5. The surface acidity of ZSM-5 samples derived from NH<sub>3</sub>-TPD.

| Sample | T <sub>1</sub> / °C | Weak acidity<br>/ (μmol·g <sup>-1</sup> ) | T <sub>2</sub> / °C | Strong acidity<br>/ (μmol·g <sup>-1</sup> ) |
|--------|---------------------|-------------------------------------------|---------------------|---------------------------------------------|
| Z5     | 157.0               | 106.2                                     | 333.0               | 144.7                                       |
| Z5-Si1 | 155.0               | 103.5                                     | 334.2               | 125.0                                       |
| Z5-Si2 | 155.5               | 104.3                                     | 340.7               | 114.1                                       |
| Z5-Si3 | 150.4               | 106.5                                     | 338.3               | 108.7                                       |

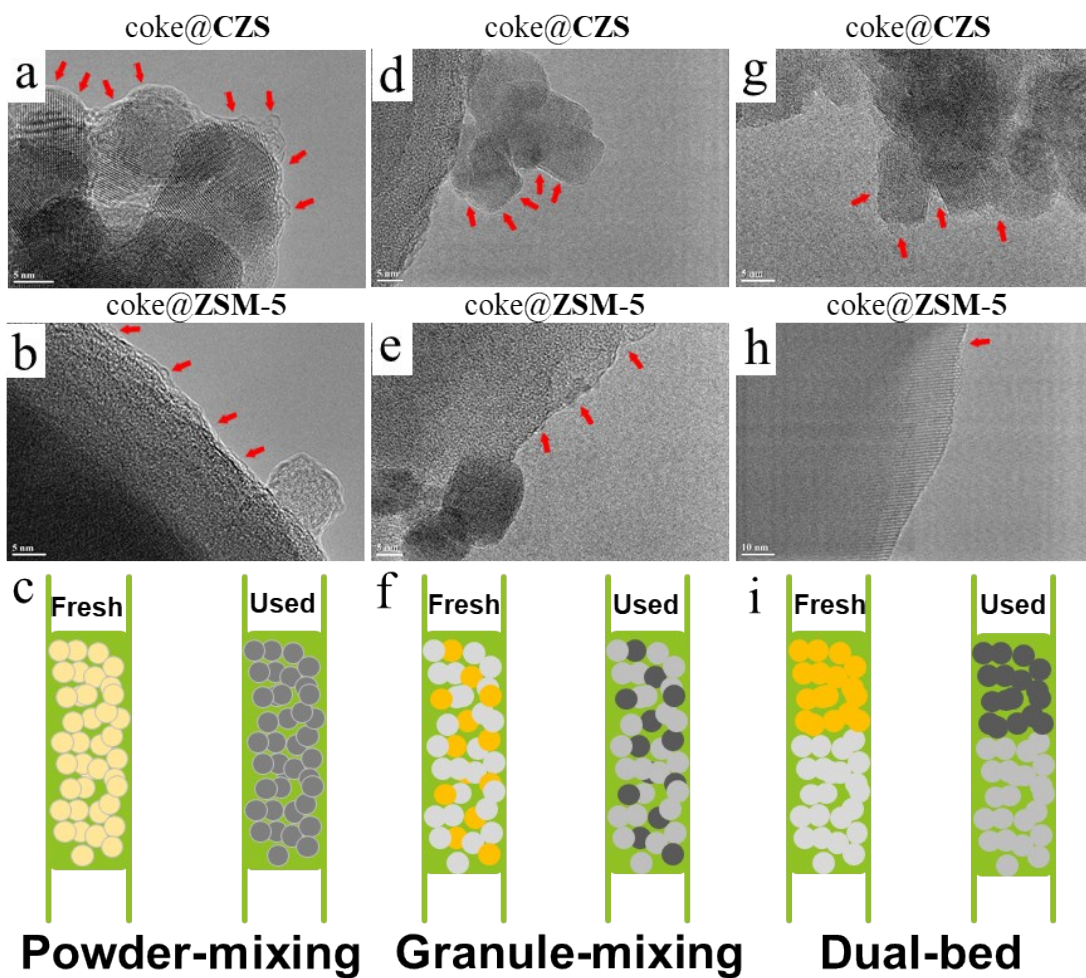

Fig. S8. The TEM images of coke on catalysts with different proximity. a-c) powder-mixing, d-f) granule-mixing and g-i) dual-bed. Reaction conditions: catalyst = CZS + ZSM-5 (weight ratio = 1), 450 °C, 3.6 MPa, TOS = 20 h, GHSV = 600 ml<sub>syngas</sub> / g<sub>cat.</sub>·h.



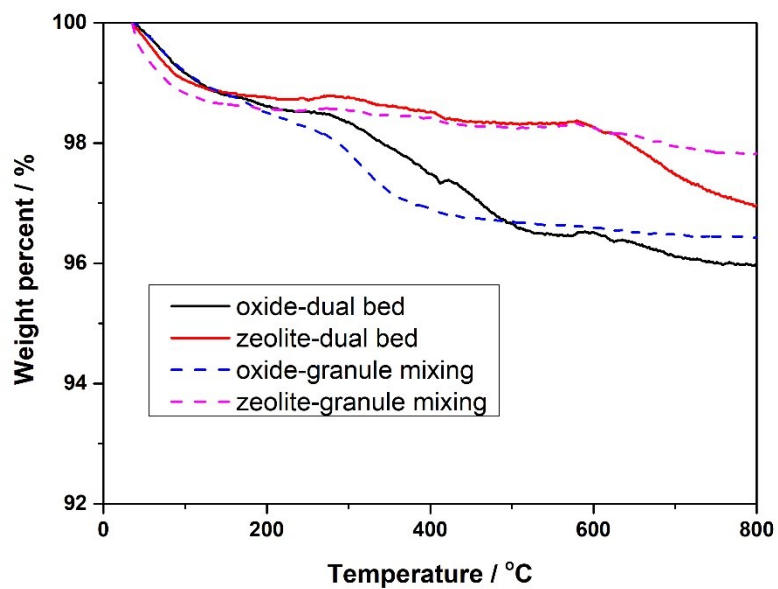

Fig. S9. The TGA curves of the used bifunctional catalyst. Reaction conditions: catalyst = CZS + ZSM-5 (weight ratio = 1), 450 °C, 3.6 MPa, TOS = 20 h, GHSV = 600 ml<sub>syngas</sub> / g<sub>cat.</sub> · h.
